# Supplementary material
Source: bioRxiv or medRxiv preprint supplement (https://medrxiv.org/highwire/filestream/96543/field_highwire_adjunct_files/0/2020.09.09.20187104-1.pdf)

Figure S1. Pathogenicity scores of missense variants in *RFX3*, *RFX4*, and *RFX7*.

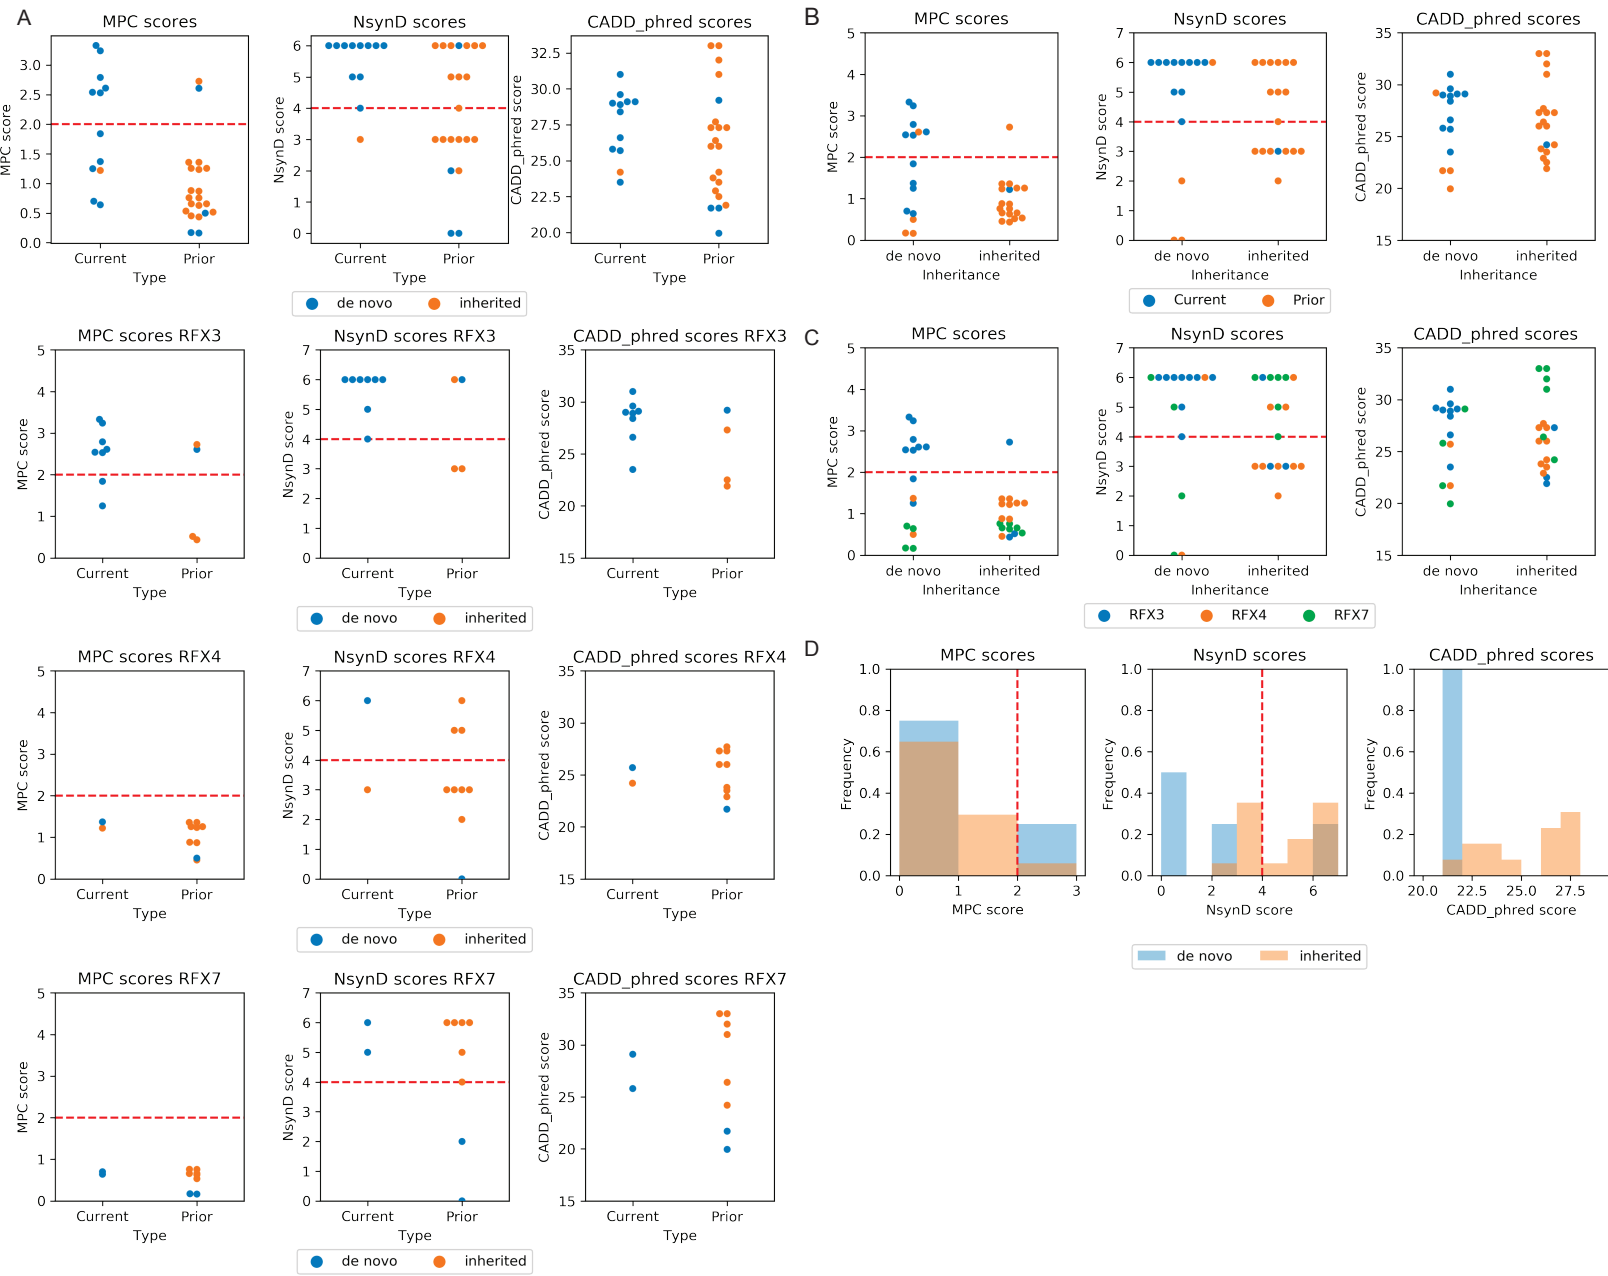



Figure S3. RFX3 and RFX4 binding motifs are present in ASD-associated gene promoters.

A

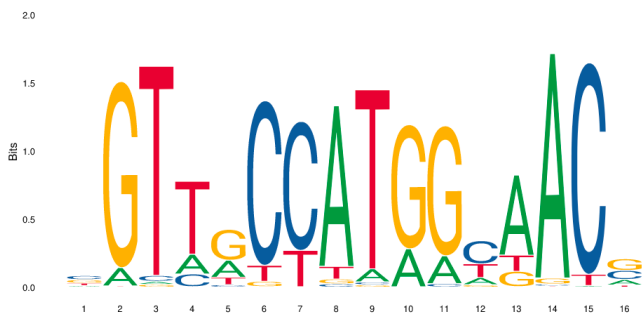

B

**RFX3 Motif Occurrences**

| Gene Symbol  | Start | Stop | p-value  | q-value | Matched Sequence |
|--------------|-------|------|----------|---------|------------------|
| <i>AP2S1</i> | 1223  | 1238 | 2.39E-08 | 0.00318 | GGTCGCCATGGTAACG |
| <i>KDM6B</i> | 854   | 869  | 2.43E-08 | 0.00318 | GGTTGCCATGGAAACA |
| <i>ANK2</i>  | 941   | 956  | 2.08E-07 | 0.0174  | TGCTGCCATGGCAACG |
| <i>MYT1L</i> | 720   | 735  | 7.63E-07 | 0.0361  | GGTTGCCATGGCCACC |
| <i>NONO</i>  | 693   | 708  | 8.63E-07 | 0.0361  | GGTTACCATGGAAATG |

C

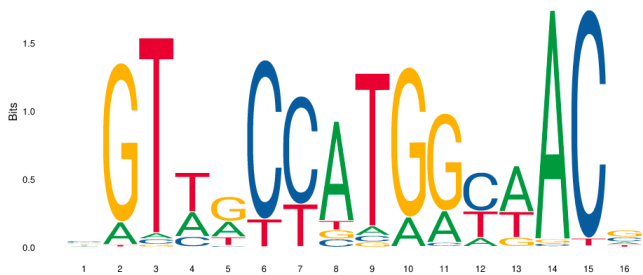

D

**RFX4 Motif Occurrences**

| Gene Symbol  | Start | Stop | p-value  | q-value | Matched Sequence |
|--------------|-------|------|----------|---------|------------------|
| <i>AP2S1</i> | 1223  | 1238 | 2.94E-08 | 0.00736 | GGTCGCCATGGTAACG |
| <i>KDM6B</i> | 854   | 869  | 1.51E-07 | 0.0158  | GGTTGCCATGGAAACA |
| <i>ANK2</i>  | 941   | 956  | 5.16E-07 | 0.0431  | TGCTGCCATGGCAACG |
| <i>MYT1L</i> | 720   | 735  | 1.10E-06 | 0.0646  | GGTTGCCATGGCCACC |

E

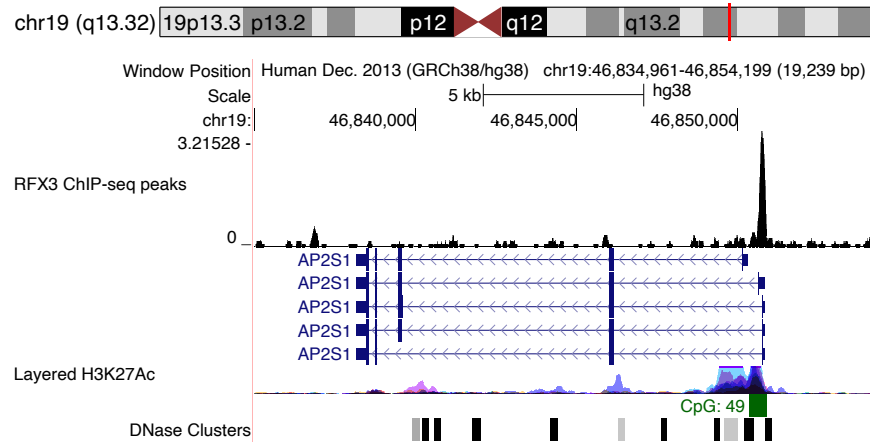

F

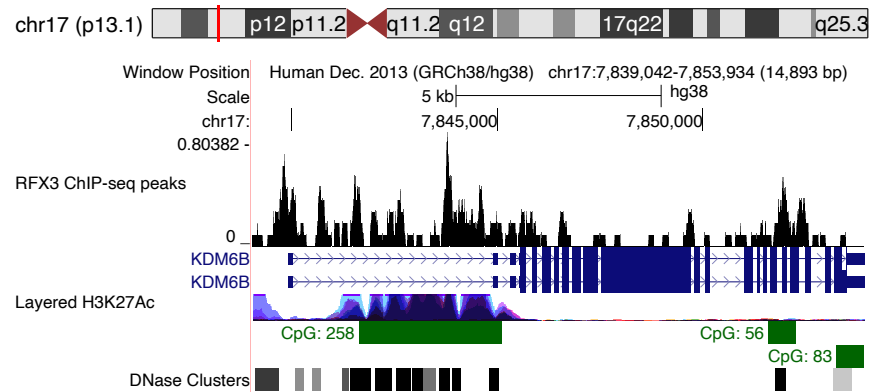

G

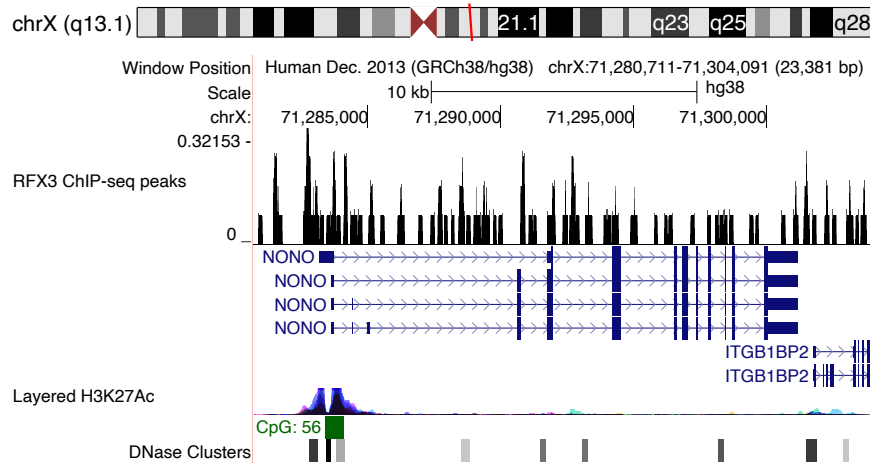

Figure S4. Customized KEGG enrichment analysis of RFX functional binding sites.

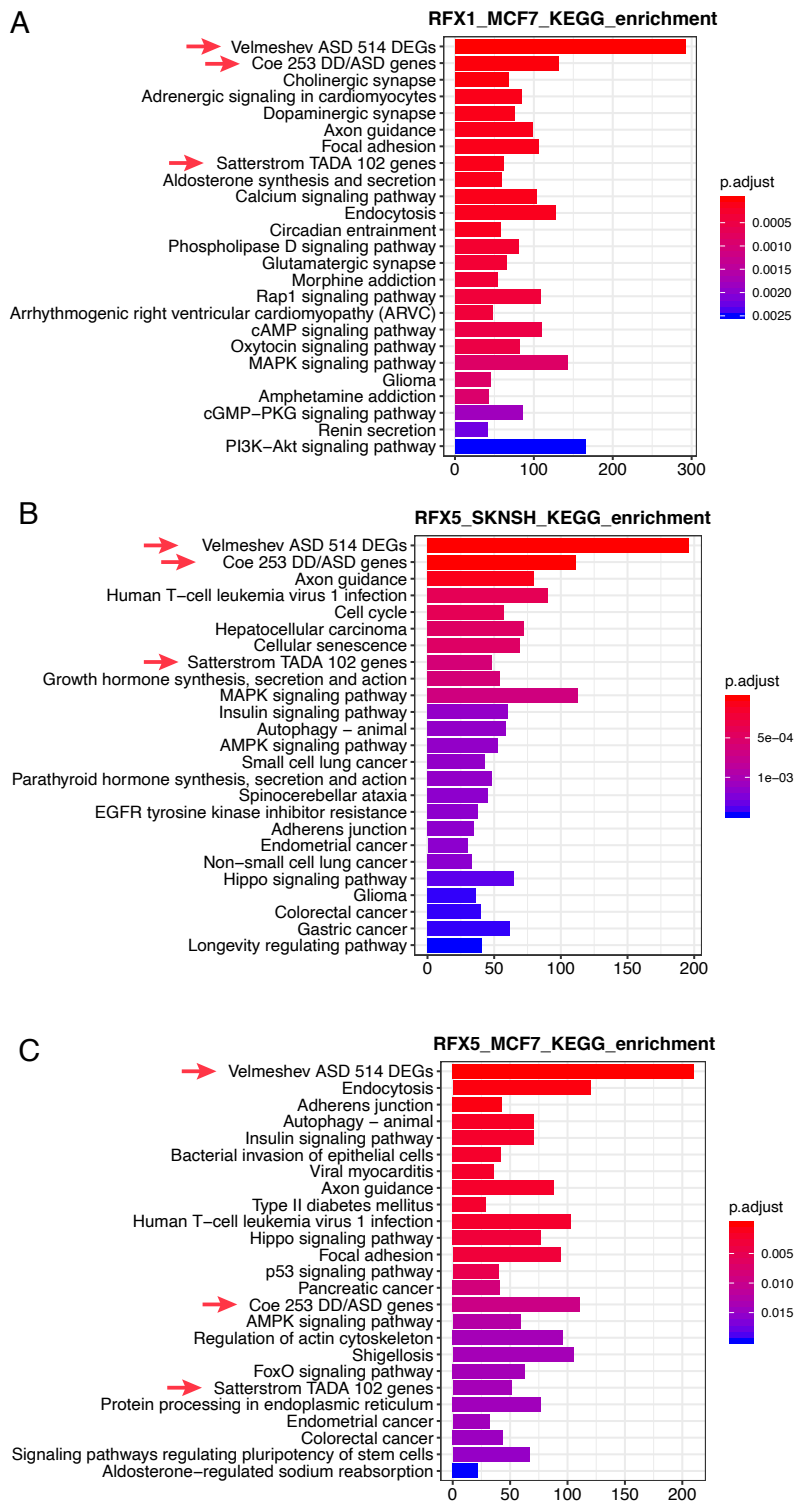

Figure S5. Correlation of enrichment significance in ASD gene sets with *RFX* expression level.

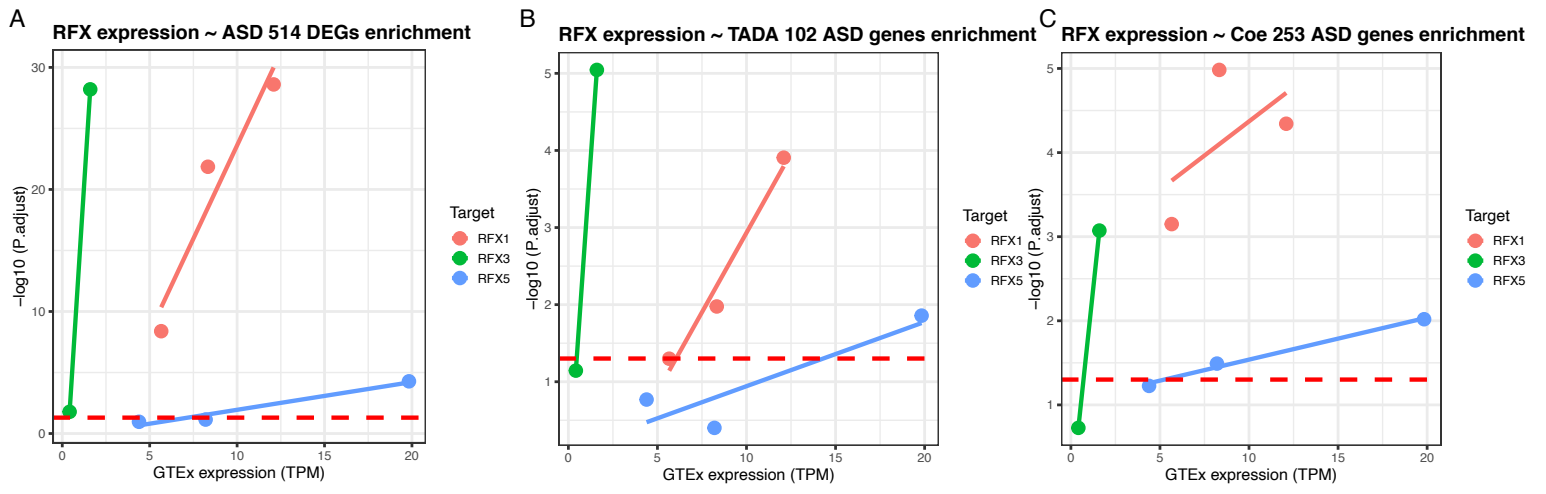

Supplement: Supplementary file [file 2020.09.09.20187104-1.pdf]
